# Supplementary material for: Novel Insights into the Prognosis and Immunological Value of the SLC35A (Solute Carrier 35A) Family Genes in Human Breast Cancer
Source: MDPI journal article supplement (doi:10.3390/biomedicines9121804), 2021-11-30
Supplement: s1 [file s1]

# Supplementary data

**Table S1.** Basic characteristics of the solute carrier 36A2 (SLC35A2) gene in the Oncomine database

| <i>Gene</i>    | <i>Dataset</i>         | <i>group comparison</i>                                 | <i>fold change</i> | <i>p-value</i> | <i>number of patients</i> |
|----------------|------------------------|---------------------------------------------------------|--------------------|----------------|---------------------------|
| <b>SLC35A2</b> | Curtis Breast (n=2136) | Invasive Breast Carcinoma vs. Normal                    | 2,056              | 6.86E-09       | 21/165                    |
|                |                        | Mucinous Breast Carcinoma vs. Normal                    | 2,136              | 3.6E-26        | 46/190                    |
|                |                        | Invasive Ductal Breast Carcinoma vs. Normal             | 2,295              | 7.3E-88        | 1556/1700                 |
|                |                        | Ductal Breast Carcinoma in Situ vs. Normal              | 2,195              | 1.14E-04       | 10/154                    |
|                |                        | Medullary Breast Carcinoma vs. Normal                   | 2,397              | 1.73E-13       | 32/176                    |
|                | TCGA breast (n=593)    | Invasive Lobular Breast Carcinoma vs. Normal            | 2,212              | 1.63E-18       | 36/97                     |
|                |                        | Invasive Breast Carcinoma vs. Normal                    | 2,462              | 5.88E-31       | 76/137                    |
|                |                        | Mix Lobular and Ductal Breast carcinoma vs. Normal      | 2.151              | 1.52E-6        | 7/68                      |
|                |                        | Invasive Ductal Breast Carcinoma vs. Normal             | 2,141              | 1,02E-38       | 389/450                   |
|                |                        | Male Breast Carcinoma vs. Normal                        | 2.713              | 3.13E-7        | 3/64                      |
|                |                        | Intraductal Cribriform Breast Adenocarcinoma vs. Normal | 2,539              | 4.52E-4        | 3/64                      |
|                |                        | Invasive Ductal Breast Carcinoma Epithelia vs. Normal   | 2,259              | 1.31E-04       | 9/23                      |
|                | Ma breast 4 (n=66)     | Ductal Breast Carcinoma in Situ Epithelia vs. Normal    | 2,234              | 1.23E-4        | 9/23                      |

**Table S2.** Statistical values of solute carrier 35A (SLC35A) family gene expressions based on individual cancer stages

| <b>Comparison</b>        | <b>P-value</b> |                |                |                |                |
|--------------------------|----------------|----------------|----------------|----------------|----------------|
|                          | <b>SLC35A1</b> | <b>SLC35A2</b> | <b>SLC35A3</b> | <b>SLC35A4</b> | <b>SLC35A5</b> |
| <b>Normal - Stage 1</b>  | 4,49E-02       | <1E-12         | 1,28E-07       | 3,56E-02       | 2,62E-12       |
| <b>Normal - Stage 2</b>  | 8,39E-02       | <1E-12         | 1,49E-10       | 3,97E-01       | 6,93E-13       |
| <b>Normal - Stage 3</b>  | 3,49E-01       | <1E-12         | 9,56E-09       | 1,86E-02       | 1,37E-08       |
| <b>Normal - Stage 4</b>  | 2,32E-01       | 7,39E-07       | 4,20E-01       | 8,01E-01       | 1,61E-05       |
| <b>Stage 1 - Stage 2</b> | 5,34E-01       | 8,84E-04       | 6,18E-01       | 1,65E-01       | 3,20E-01       |
| <b>Stage 1 - Stage 3</b> | 2,79E-01       | 2,32E-03       | 1,08E-01       | 7,85E-01       | 2,89E-01       |
| <b>Stage 1 - Stage 4</b> | 9,18E-01       | 1,12E-01       | 3,22E-01       | 2,85E-01       | 4,77E-01       |
| <b>Stage 2 - Stage 3</b> | 5,23E-01       | 9,48E-01       | 2,83E-02       | 9,68E-02       | 7,43E-01       |
| <b>Stage 2 - Stage 4</b> | 7,77E-01       | 6,34E-01       | 4,41E-01       | 5,77E-01       | 3,72E-01       |
| <b>Stage 3 - Stage 4</b> | 5,96E-01       | 5,64E-01       | 2,43E-01       | 3,13E-01       | 3,61E-01       |

Hallmark pathways Enrichment Score SLC35A2 from GSEA

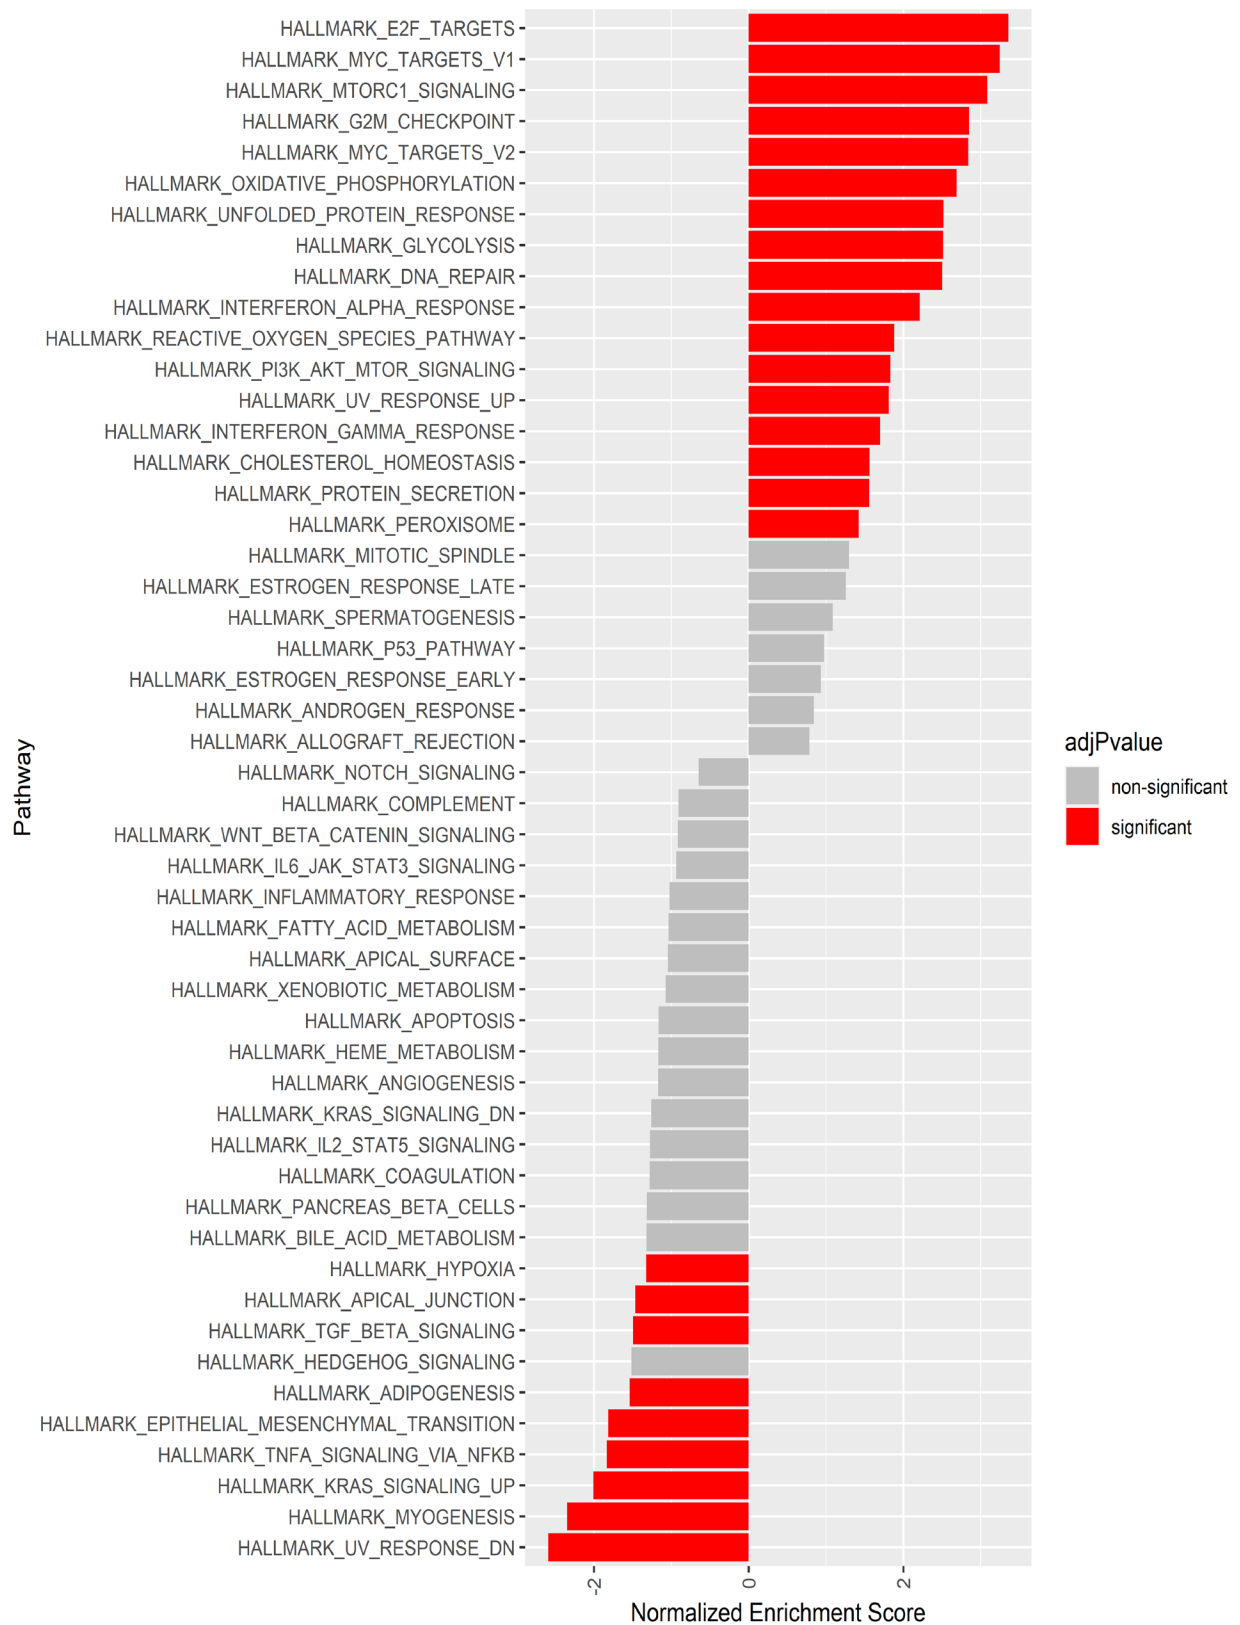

**Figure S1. Solute carrier 35A2 (SLC35A2) gene set enrichment analysis.** Bar chart shows the hallmark pathways scores related to SLC35A2. Red bars mean significant adjust-ed p values, while gray bars indicate insignificant values. A normalized enrich-ment score |NES| of >2 was set as the threshold.

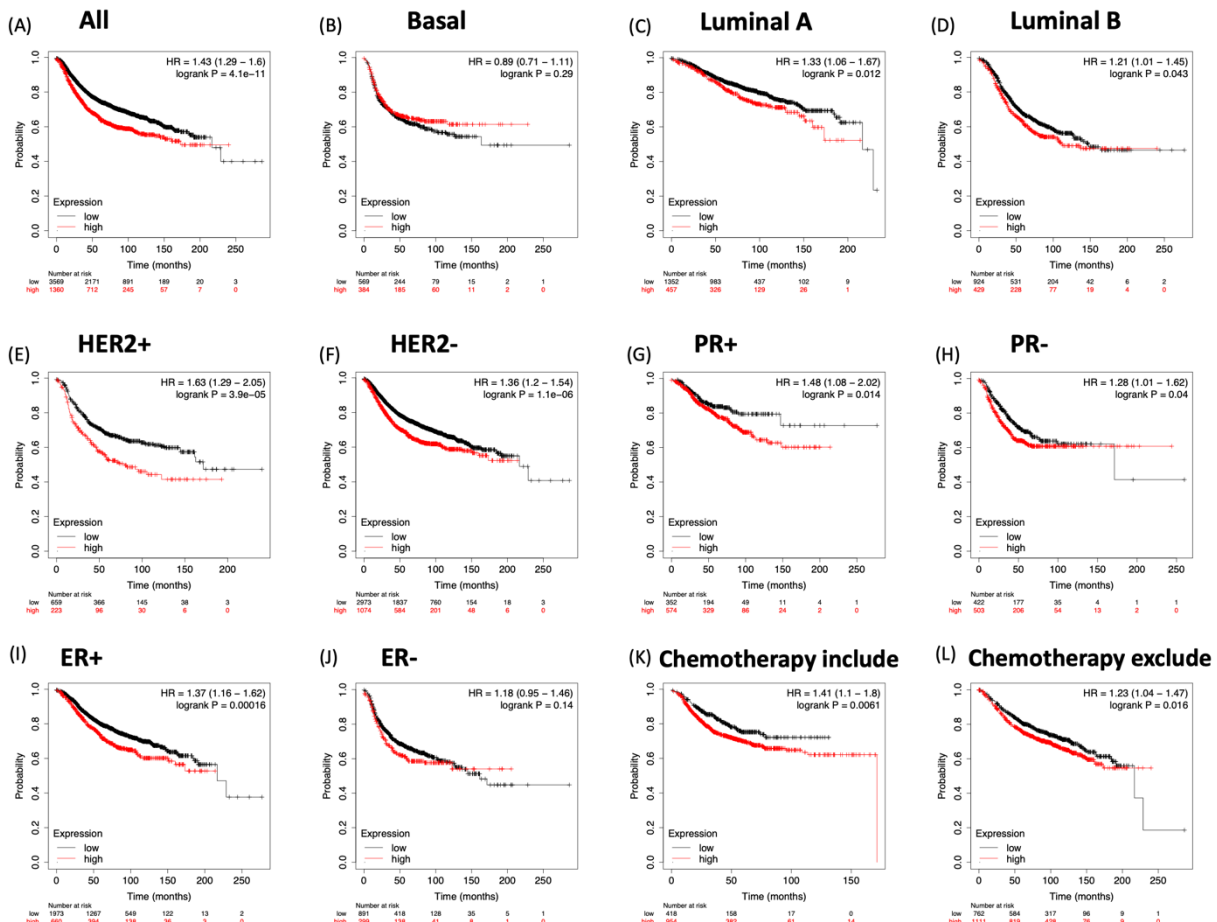

**Figure S2. Recurrence metastasis-free survival (RFS) analysis of solute carrier 35A2 (SLC35A2) in breast cancer (Kaplan-Meier plot).** Red and black curves represent survival analysis for higher and lower SLC35A mRNA expression levels, respectively. ER, estrogen receptor; HER2, human epidermal growth factor receptor 2; PR, progesterone receptor; +, positive; -, negative; chemotherapy included, excluded.

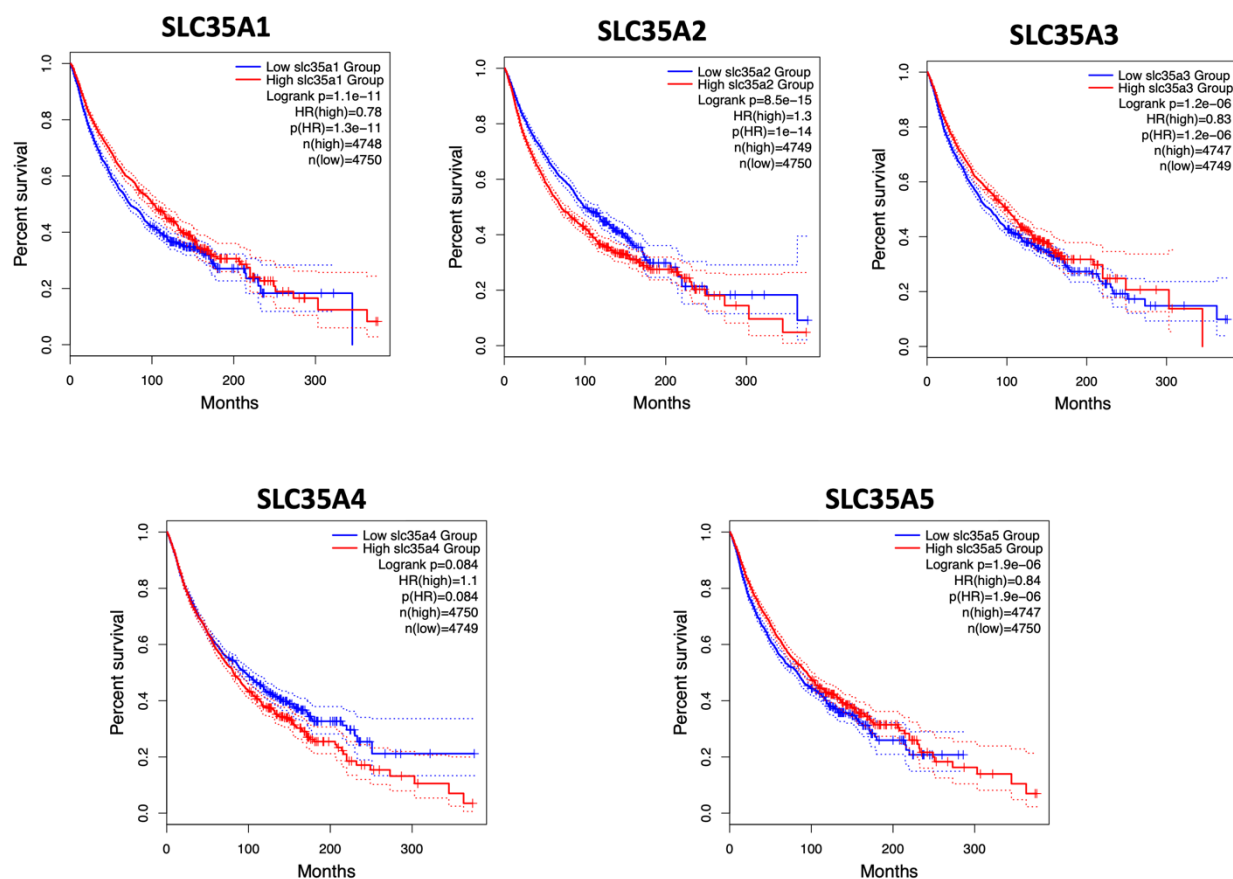

**Figure S3. Recurrence metastasis-free survival (RFS) analysis of solute carrier 35A (SLC35A) family genes across several types of cancer (Kaplan-Meier plot).** Red and blue curves represent survival analysis for higher and lower SLC35A mRNA expression levels, respectively. All data were retrieved from TCGA Pan-Cancer Atlas, and  $p < 0.05$  was considered significant..

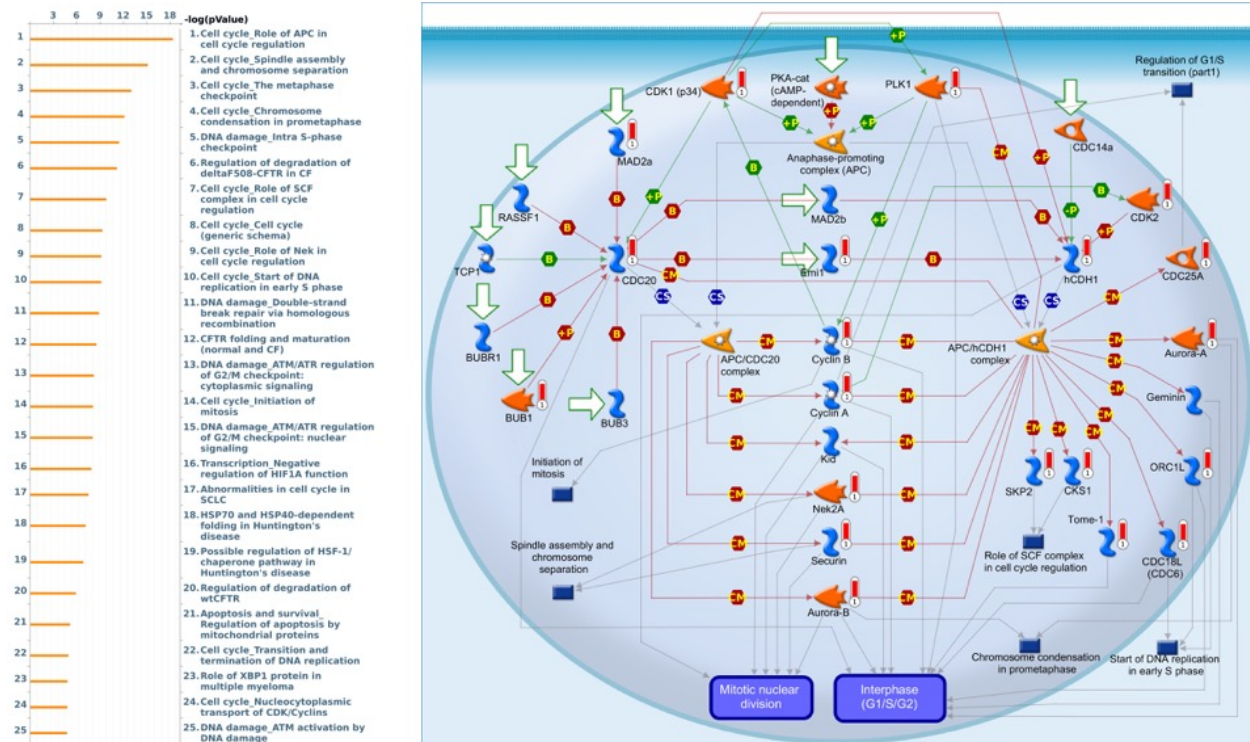

**Figure S4.** The approach was to collect the top 10% of expression gene lists from both METABRIC (2000 genes) and Pan-Cancer (1800 genes), and then overlap them to produce a final list of 1201 genes in total. The pathway list was ordered by the  $-\log p$  value from the gene lists extracted via TCGA Pan-Cancer Atlas and METABRIC breast cancer patient databases. “Cell cycle\_Role of APC in cell cy-cle regulation” was at the top of the pathway list when performing the “biological process” analysis.

**Table S3.** Pathway analysis of solute carrier 35A2 (SLC35A2)-coexpressed genes from pub-lic breast cancer databases using the MetaCore database (with  $p < 0.01$  set as the cutoff value)

| # | Maps                                                  | pValue    | Network Objects from Active Data                                                                                                                                                              |
|---|-------------------------------------------------------|-----------|-----------------------------------------------------------------------------------------------------------------------------------------------------------------------------------------------|
| 1 | Cell cycle_Role of APC in cell cycle regulation       | 4,479E-19 | CDC18L (CDC6), CDH1, Tome-1, Cyclin A, Aurora-B, CDC25A, SKP2, Cyclin B, ORC1L, CKS1, Nek2A, BUB1, EMI1, Aurora-A, PLK1, CDC20, MAD2a, Securin, CDK1 (p34), CDK2                              |
| 2 | Cell cycle_Spindle assembly and chromosome separation | 8,198E-16 | Importin (karyopherin)-alpha, RCC1, KNSL1, Aurora-B, HEC, Tubulin alpha, Cyclin B, Separase, ZW10, Nek2A, TPX2, CSE1L, Aurora-A, CDC20, MAD2a, Securin, CDK1 (p34), Tubulin (in microtubules) |
| 3 | Cell cycle_The metaphase checkpoint                   | 1,209E-13 | INCENP, SPBC25, Aurora-B, HEC, HZWint-1, ZW10, Survivin, CENP-E, Nek2A, BUB1, CENP-A, Aurora-A,                                                                                               |

|    |                                                                    |           |                                                                                                                                                                                                     |
|----|--------------------------------------------------------------------|-----------|-----------------------------------------------------------------------------------------------------------------------------------------------------------------------------------------------------|
|    |                                                                    |           | PLK1, CDCA1, CDC20, CENP-F, MAD2a                                                                                                                                                                   |
| 4  | Cell cycle_Chromosome condensation in prometaphase                 | 9,585E-13 | INCENP, Cyclin A, CNAP1, CAP-D2/D3, Aurora-B, Cyclin B, TOP2, Histone H3, CAP-G, CAP-G/G2, Aurora-A, Histone H1, CDK1 (p34)                                                                         |
| 5  | DNA damage_Intra S-phase checkpoint                                | 4,637E-12 | CDC18L (CDC6), CDH1, Histone H2AX, Chk2, MCM3, Cyclin A, Chk1, CDC25A, MCM7, MCM2, Histone H3, BLM, FANCD2, DTL (hCdt2), MCM4, FANCI (KIAA1794), PP1-cat, HUWE1, MCM10, PP1-cat alpha, CDK2, CDC45L |
| 6  | Regulation of degradation of deltaF508-CFTR in CF                  | 9,432E-12 | HSP105, UFD1, VCP, Hdj-2, HSP90, Csp, CHIP, Sti1, HSP70, Aha1, SAE1, E2I, SUMO-2, Derlin1, SUMO-3, HSPBP1                                                                                           |
| 7  | Cell cycle_Role of SCF complex in cell cycle regulation            | 2,234E-10 | Skp2/TrCP/FBXW, Chk1, CDC25A, SKP2, CKS1, CDK4, Emi1, Cyclin E, PLK1, NEDD8, CDK1 (p34), CDC34, CDK2                                                                                                |
| 8  | Cell cycle_Cell cycle (generic schema)                             | 6,805E-10 | Cyclin A, CDC25A, Cyclin B, E2F2, CDC25C, CDK4, E2F5, Cyclin E, CDC25B, CDK1 (p34), CDK2                                                                                                            |
| 9  | Cell cycle_Role of Nek in cell cycle regulation                    | 1,000E-09 | Tubulin beta, Tubulin gamma, RCC1, HEC, Tubulin alpha, Histone H3, Nek2A, TPX2, Aurora-A, MAD2a, Histone H1, CDK1 (p34), Tubulin (in microtubules)                                                  |
| 10 | Cell cycle_Start of DNA replication in early S phase               | 1,000E-09 | CDC18L (CDC6), MCM3, ORC6L, MCM4/6/7 complex, MCM2, ORC1L, RPA3, MCM4, Cyclin E, MCM10, Histone H1, CDK2, CDC45L                                                                                    |
| 11 | DNA damage_Double-strand break repair via homologous recombination | 2,005E-09 | RecQL4, DSS1, Histone H2AX, RMI2, EXO1, AUNIP, BLM, Rad51, RAD54B, RAD54L, PIR51, PLK1, Histone H2A, Histone H2B, MCM8, Histone H4, HROB, BRG1, CDK1 (p34), CDK2                                    |
| 12 | CFTR folding and maturation (normal and CF)                        | 4,217E-09 | HSP40, HSP105, DNAJB6 (Hdj-1), Hdj-2, Csp, ERp29, Sti1, HSP70, Aha1, HSP90 beta, HSPBP1                                                                                                             |

|    |                                                                          |           |                                                                                                                                                                                |
|----|--------------------------------------------------------------------------|-----------|--------------------------------------------------------------------------------------------------------------------------------------------------------------------------------|
| 13 | DNA damage_ATM/ATR regulation of G2/M checkpoint: cytoplasmic signaling  | 9,461E-09 | JAB1, BORA, Chk2, Chk1, Aurora-B, CDC25A, Histone H3, CDC25C, UBE2C, Aurora-A, PLK1, PP1-cat, CDC25B, CDK1 (p34), 14-3-3                                                       |
| 14 | Cell cycle_Initiation of mitosis                                         | 1,195E-08 | Lamin B, KNSL1, Cyclin B2, Histone H3, CDC25C, PLK1, CDC25B, FOXM1, Kinase MYT1, Histone H1, CDK1 (p34)                                                                        |
| 15 | DNA damage_ATM/ATR regulation of G2/M checkpoint: nuclear signaling      | 1,320E-08 | CDC18L (CDC6), CDH1, HSF1, Histone H2AX, Chk2, Cyclin A, Chk1, Cyclin B, Cyclin B2, TTK, CDC25C, PLK1, CDK1 (p34), CDK2                                                        |
| 16 | Transcription_Negative regulation of HIF1A function                      | 1,887E-08 | HSP40, MCM3, MCM7, ARD1, VCP, MCM2, PSMA7, HSP90, Calpain 1(mu), PRDX4, CHIP, HSP70, RUVBL2, Sirtuin7, HSP90 beta, LAMP2, Elongin C                                            |
| 17 | Abnormalities in cell cycle in SCLC                                      | 4,684E-08 | Cyclin A, Aurora-B, SKP2, E2F2, Histone H3, CKS1, CDK4, Cyclin E, CDK1 (p34), Cyclin E2, CDK2                                                                                  |
| 18 | HSP70 and HSP40-dependent folding in Huntington's disease                | 1,070E-07 | HSP40, PSMD1, DNAJB6 (Hdj-1), Hdj-2, HSP90, CHIP, Sti1, HSP70, HSP90 beta, Cathepsin D                                                                                         |
| 19 | Possible regulation of HSF-1/ chaperone pathway in Huntington's disease  | 2,319E-07 | HSP40, HSF1, HSP90, PLA2, HSP70, E2I, PLK1, SUMO-2, HSP90 beta                                                                                                                 |
| 20 | Regulation of degradation of wtCFTR                                      | 2,100E-06 | HSP105, UFD1, VCP, HSP90, Csp, CHIP, Derlin1, HSPBP1                                                                                                                           |
| 21 | Apoptosis and survival_Regulation of apoptosis by mitochondrial proteins | 1,167E-05 | Cathepsin L, Cyclin A, VDAC 1, Bax, PP2C, IFI27, MPTP complex, VDAC 2, Aif, Calpain 1(mu), TIMM8A, Metaxin 1, Smac/Diablo, 14-3-3 zeta/delta, PP1-cat alpha, Cathepsin D, CDK2 |
| 22 | Cell cycle_Transition and termination of DNA replication                 | 2,013E-05 | TOP2 alpha, Cyclin A, MCM2, TOP2, POLD reg (p50), FEN1, CDK1 (p34), CDK2                                                                                                       |
| 23 | Role of XBP1 protein in multiple myeloma                                 | 2,618E-05 | SERP1, DNAJB11, GRP78, PSMA7, PSMA5, PSMA6, ERP5                                                                                                                               |
| 24 | Cell cycle_Nucleocytoplasmic transport of CDK/Cyclins                    | 2,642E-05 | Importin (karyopherin)-alpha, Cyclin A, CDK4, Cyclin E, CDK1 (p34), CDK2                                                                                                       |
| 25 | DNA damage_ATM activation by DNA damage                                  | 2,946E-05 | RecQL4, Histone H2AX, CDK5, SKP2, Histone H3, HSP90, Calpain 1(mu), TTI1, NK31, HSP90 beta,                                                                                    |

|    |                                                                                           |           |                                                                                                                      |
|----|-------------------------------------------------------------------------------------------|-----------|----------------------------------------------------------------------------------------------------------------------|
|    |                                                                                           |           | Histone H1.2, Histone H2B, Histone H4                                                                                |
| 26 | Cell cycle_ESR1 regulation of G1/S transition                                             | 3,035E-05 | Cyclin A, Skp2/TrCP/FBXW, CDC25A, SKP2, CKS1, CDK4, Cyclin A2, Cyclin E, CDK2                                        |
| 27 | DNA damage_ATM/ATR regulation of G1/S checkpoint                                          | 3,537E-05 | Histone H2AX, Chk2, Cyclin A, p70 S6 kinases, Chk1, CDC25A, CDK4, Cyclin E, CDK2, RFW3                               |
| 28 | Cell cycle_Role of 14-3-3 proteins in cell cycle regulation                               | 5,293E-05 | Chk2, Chk1, CDC25A, CDC25C, 14-3-3 zeta/delta, CDC25B, CDK1 (p34)                                                    |
| 29 | DNA damage_ATM-dependent double-strand break foci                                         | 6,385E-05 | Histone H2AX, SET8, UFD1, VCP, Histone H3, E2I, Histone H2A, Histone H1.2, Histone H2B, Histone H4, BRG1, Mi-2 alpha |
| 30 | Cell cycle_Sister chromatid cohesion                                                      | 7,295E-05 | Cyclin B, Separase, Histone H3, DCC1, Securin, Histone H1, CDK1 (p34)                                                |
| 31 | Transcription_Role of heterochromatin protein 1 (HP1) family in transcriptional silencing | 9,470E-05 | Mi-2, CDC25A, Histone H3, Cyclin A2, Cyclin E, E2I, Histone H4, CDK1 (p34), Mi-2 alpha                               |
| 32 | Reproduction_Progesterone-mediated oocyte maturation                                      | 9,470E-05 | CDC25C, BUB1, c-Src, Aurora-A, PLK1, CDC20, CDC25B, Kinase MYT1, CDK1 (p34)                                          |
| 33 | Apoptosis and survival_Granzyme A signaling                                               | 1,162E-04 | PAR1, Histone H3, NDPK A, HSP70, hnRNP C, Histone H2B, Histone H4, Lamin B1, Histone H1                              |
| 34 | Development_Glucocorticoid receptor signaling                                             | 1,315E-04 | NCOA1 (SRC1), HSP90, HSP70, NCOA2 (GRIP1/TIF2), FKBP4, C/EBPbeta, E2I                                                |
| 35 | Putative pathways of activation of monoclonal protein secretion in multiple myeloma       | 1,315E-04 | SSR-delta, SERP1, DNAJB11, SRP-alpha, GRP78, ARMET, ERP5                                                             |
| 36 | Transport_RAN regulation pathway                                                          | 1,384E-04 | Importin (karyopherin)-alpha, RCC1, RanGAP1, NTF2, E2I, RanBP1                                                       |
| 37 | Immune response_Antigen presentation by MHC class I: cross-presentation                   | 2,710E-04 | SEC22B, Cathepsin L, HSP105, IP-30, HYOU1, DAP12, VCP, VAMP8, HSP60, HSP90, CHIP, HSP70, Endoplasmin, Calreticulin   |
| 38 | HCV-dependent transcription regulation leading to HCC                                     | 3,573E-04 | Bax, SKP2, CDK4, HSP70, Cyclin E, CDK2                                                                               |
| 39 | GTP-XTP metabolism                                                                        | 3,598E-04 | KGUA, RRP41, RPA16, GMPS, RPA39, POLR2D, POLR2J, NDPK A, HPRT, POLR3K, RPB8, IMD1, PNPH                              |



|    |                                                                                            |           |                                                                                                                        |
|----|--------------------------------------------------------------------------------------------|-----------|------------------------------------------------------------------------------------------------------------------------|
| 40 | Cigarette smoke-mediated regulation of NRF2-antioxidant pathway in airway epithelial cells | 3,608E-04 | ME1, TALDO, G6PD, PRDX1, TXNRD1, SRX1, Pirin                                                                           |
| 41 | Cell adhesion_Gap junctions                                                                | 4,714E-04 | Tubulin beta, E-cadherin, Actin cytoskeletal, Tubulin alpha, Actin, Tubulin (in microtubules)                          |
| 42 | DNA damage_Nucleotide excision repair                                                      | 4,840E-04 | Centrin-2, EZH2, UFD1, DNA polymerase kappa, VCP, Histone H3, DTL (hCdt2), Histone H2A, Histone H2B, NEDD8, Histone H4 |
| 43 | Apoptosis and survival_DNA-damage-induced apoptosis                                        | 5,142E-04 | Histone H2AX, Chk2, Chk1, BLM, FANCD2                                                                                  |
| 44 | Epigenetic alterations in ovarian cancer                                                   | 5,319E-04 | DNMT3B, E-cadherin, EZH2, Bax, Aurora-B, SKP2, Histone H3, CDK4, Aurora-A, CDC20, Claudin-4, SSTR1                     |
| 45 | Signal transduction_mTORC1 downstream signaling                                            | 5,363E-04 | 4E-BP1, p70 S6 kinases, GLUT1, HMGCS2, G6PD, SCD, MTHFD2, p70 S6 kinase2, MVK, ATG13                                   |
| 46 | NETosis in SLE                                                                             | 5,589E-04 | Histone H3, Histone H2, Histone H2A, Histone H1.2, Histone H4, CAMP, Histone H1                                        |
| 47 | LRRK2 in neurons in Parkinson's disease                                                    | 8,350E-04 | Actin cytoskeletal, MARK2, HSP90, CHIP, ACTB, Tubulin (in microtubules), 14-3-3                                        |
| 48 | LRRK2 in neuronal apoptosis in Parkinson's disease                                         | 9,777E-04 | Thioredoxin, VDAC 1, MPTP complex, ANT, Caspase-3                                                                      |
| 49 | Immune response_Antigen presentation by MHC class I, classical pathway                     | 1,009E-03 | PSMB5, TAP1 (PSF1), CHIP, HSP70, BCAP31, Endoplasmin, Calreticulin, Impas 1, PSMB2                                     |
| 50 | Oxidative stress_Role of ASK1 under oxidative stress                                       | 1,009E-03 | Thioredoxin, HPK38, UNRIP, PRDX1, c-Src, MT-TRX, 14-3-3 zeta/delta, Glutaredoxin, 14-3-3                               |
